# Supplementary material for: Altered Transcriptional Regulation of Glycolysis in Circulating CD8+ T Cells of Rheumatoid Arthritis Patients
Source: MDPI journal article supplement (doi:10.3390/genes13071216), 2022-07-07
Supplement: s1 [file s1]

# Supplementary Figures

## Comparison of untreated RA and TCZ treated CD8<sup>+</sup> Tem cells

The expression levels of genes from glycolysis, pentose phosphate pathway, TCA cycle, Oxidative phosphorylation complex 1, 4 and 5 in the CD8<sup>+</sup> Tem cells from healthy, untreated and TCZ treated individuals are shown in the following figures. Significant differential expression is marked by asterisk (\*\*\*)

Glycolysis genes CD8 Tem cells

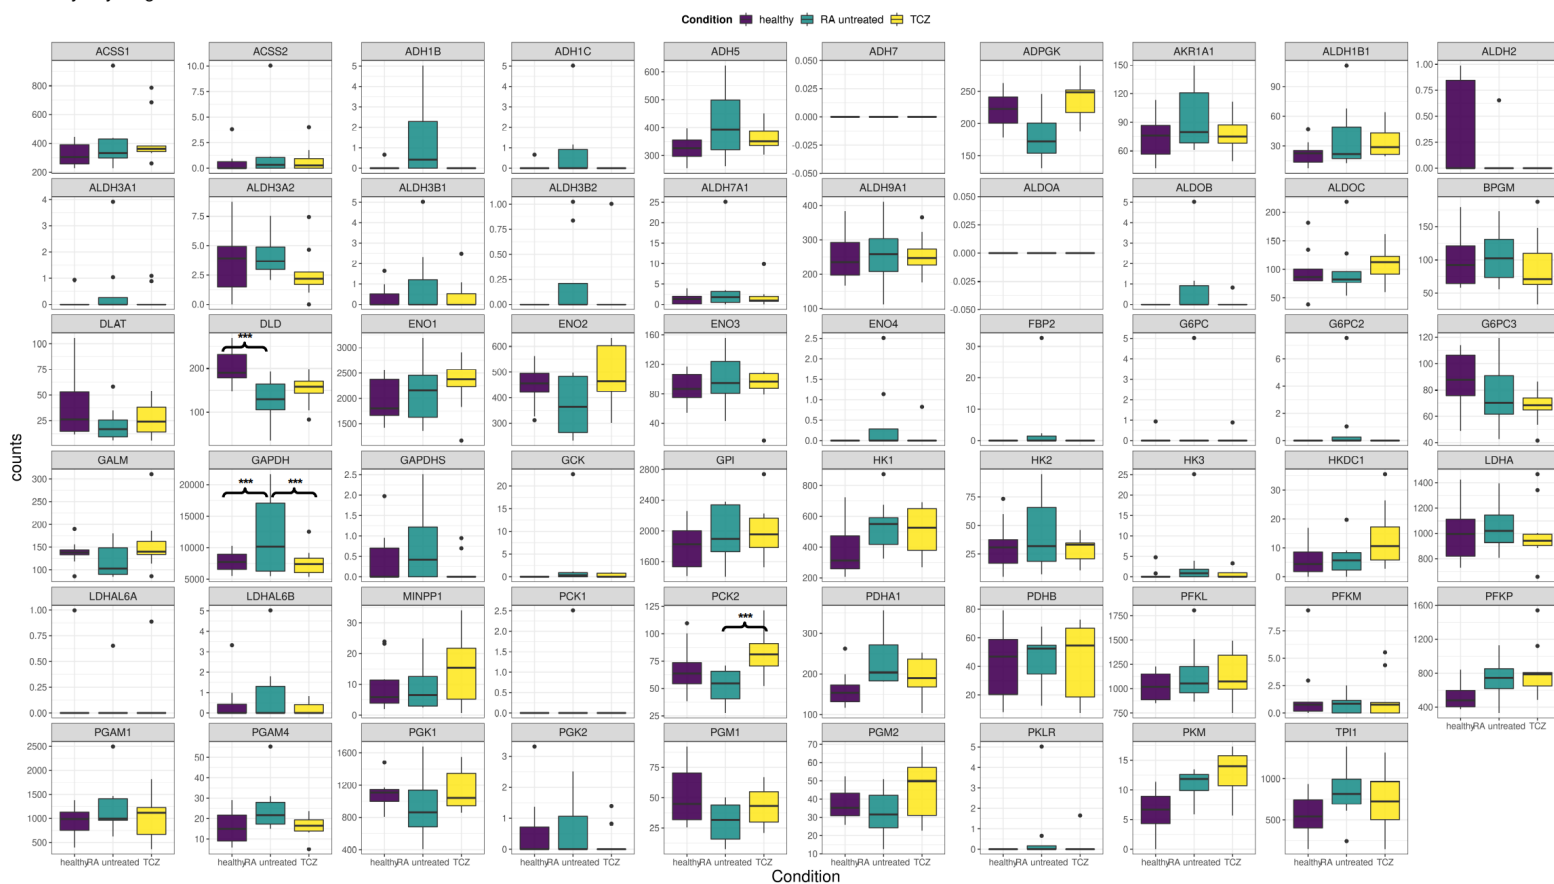

Figure S1. Normalized counts of glycolysis genes in untreated RA CD8<sup>+</sup> Tem cells and TCZ treated RA CD8<sup>+</sup> Tem cells.

# PPP genes CD8 Tem cells

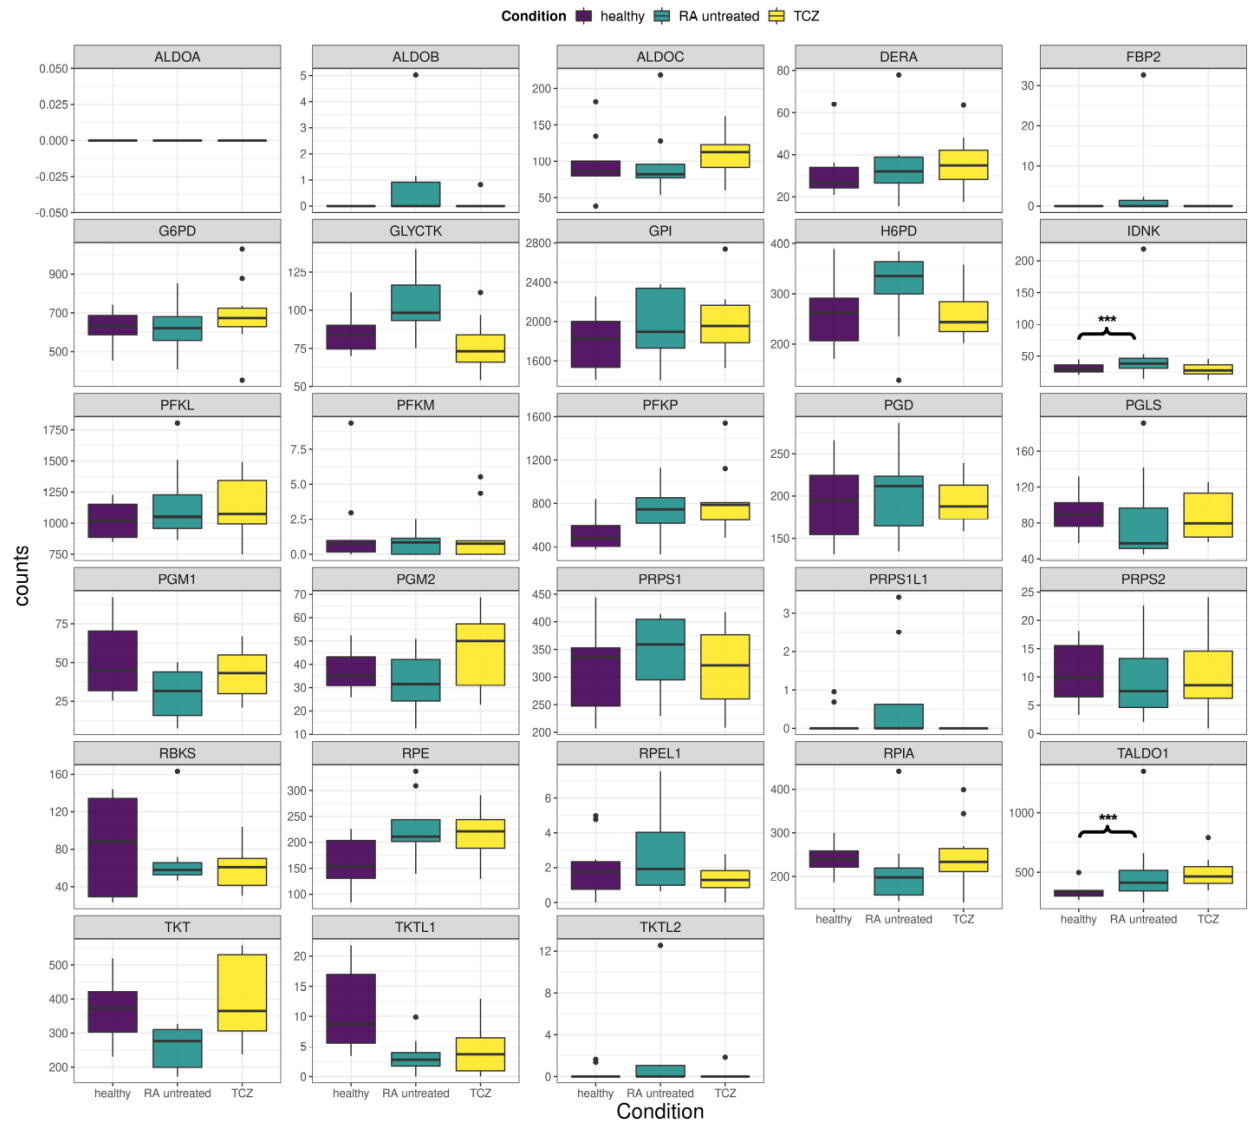

Figure S2. Normalized counts of pentose phosphate pathway genes in untreated RA CD8<sup>+</sup> Tem cells and TCZ treated RA CD8<sup>+</sup> Tem cells.

# TCA cycle genes CD8 Tem cells

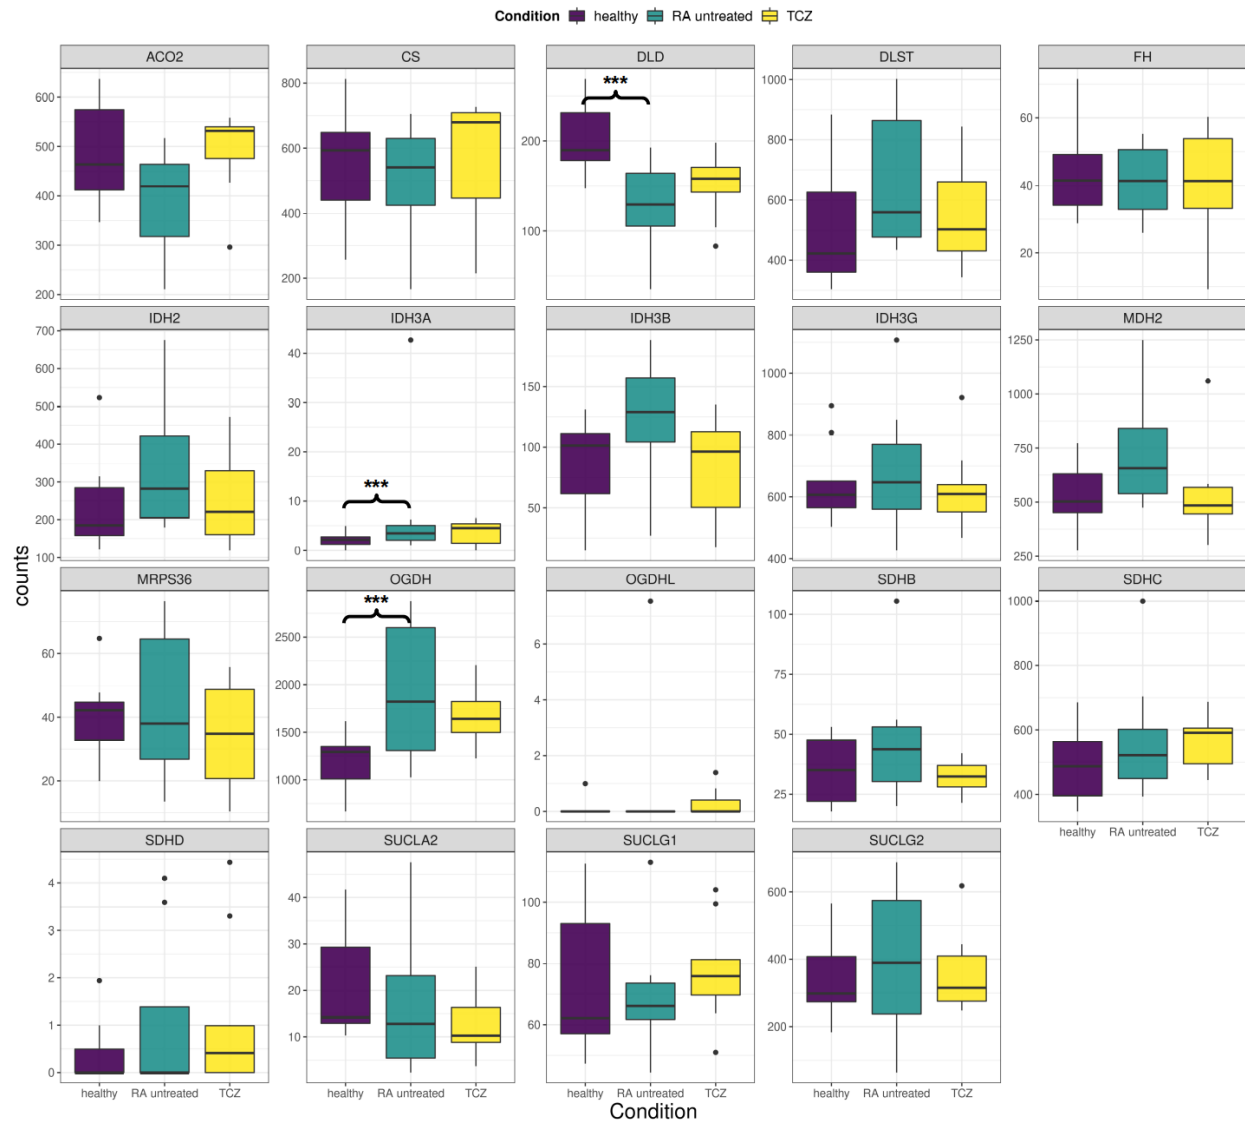

Figure S3. Normalized counts of TCA cycle genes in untreated RA CD8<sup>+</sup> Tem cells and TCZ treated RA CD8<sup>+</sup> Tem cells.

## OXPHOS Complex 1 genes CD8 Tem cells

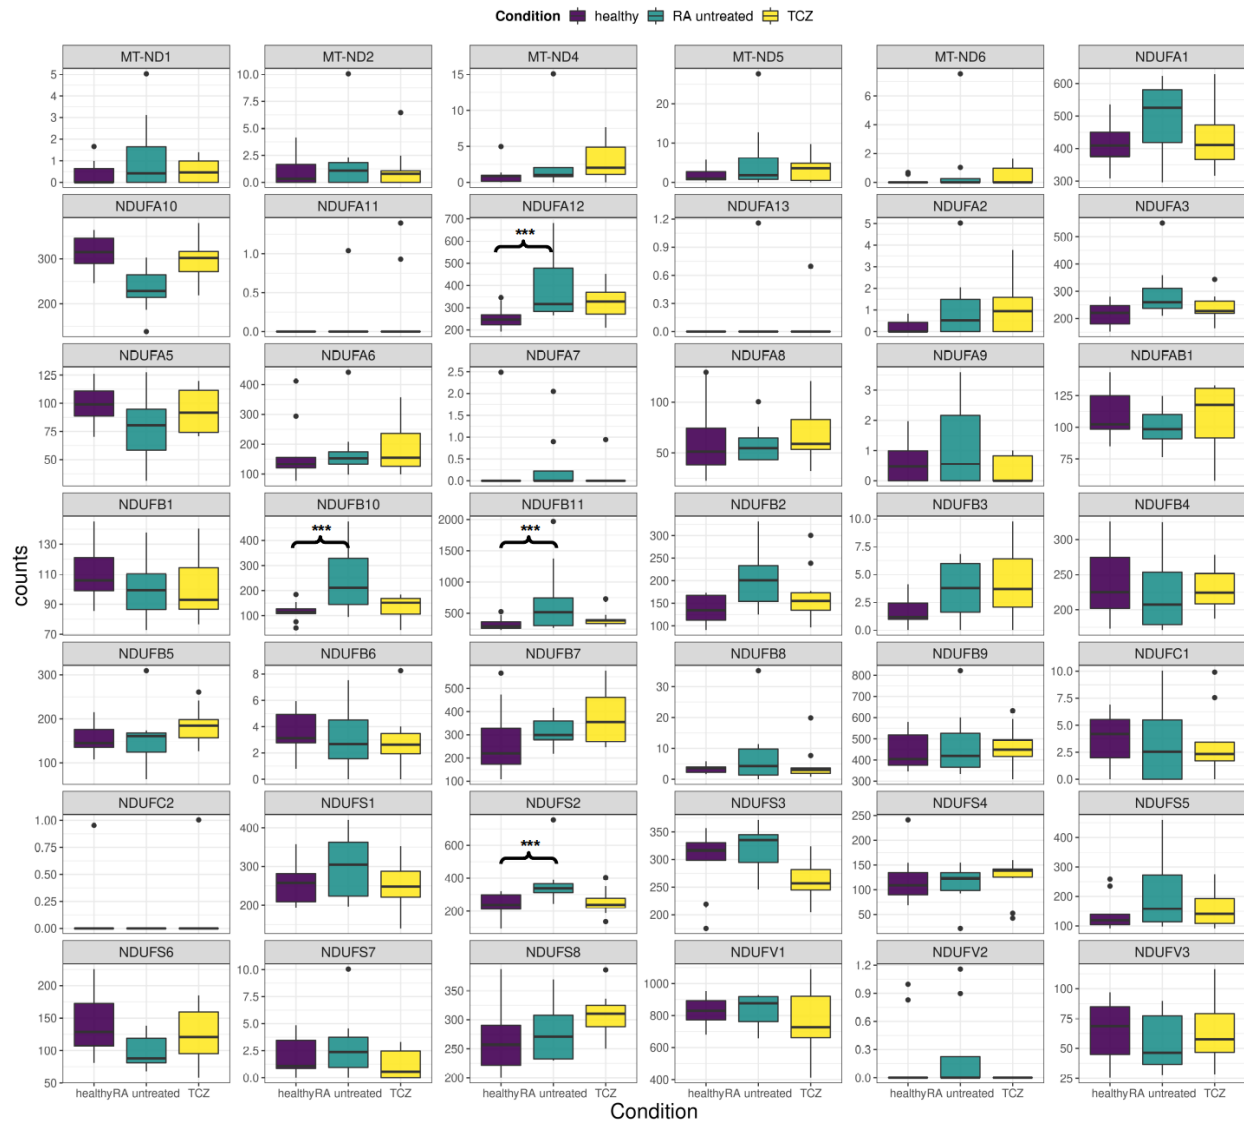

Figure S4. Normalized counts of oxidative phosphorylation complex 1 genes in untreated RA CD8<sup>+</sup> Tem cells and TCZ treated RA CD8<sup>+</sup> Tem cells.

# OXPHOS Complex 4 genes CD8 Tem cells

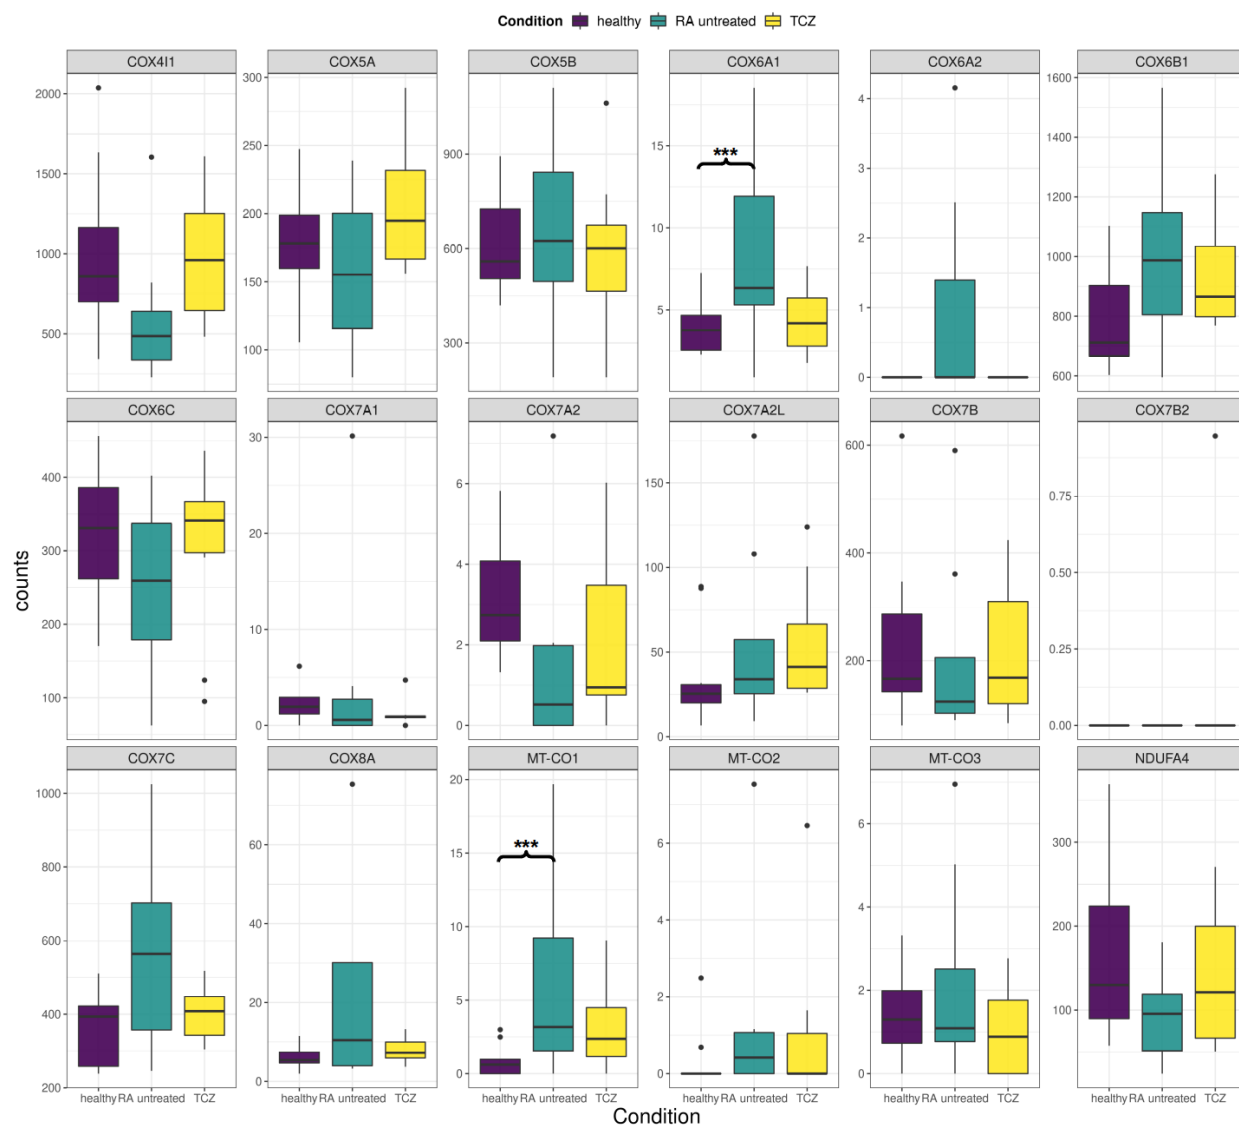

Figure S5. Normalized counts of oxidative phosphorylation complex 4 genes in untreated RA CD8<sup>+</sup> Tem cells and TCZ treated RA CD8<sup>+</sup> Tem cells.

## OXPHOS Complex 5 genes CD8 Tem cells

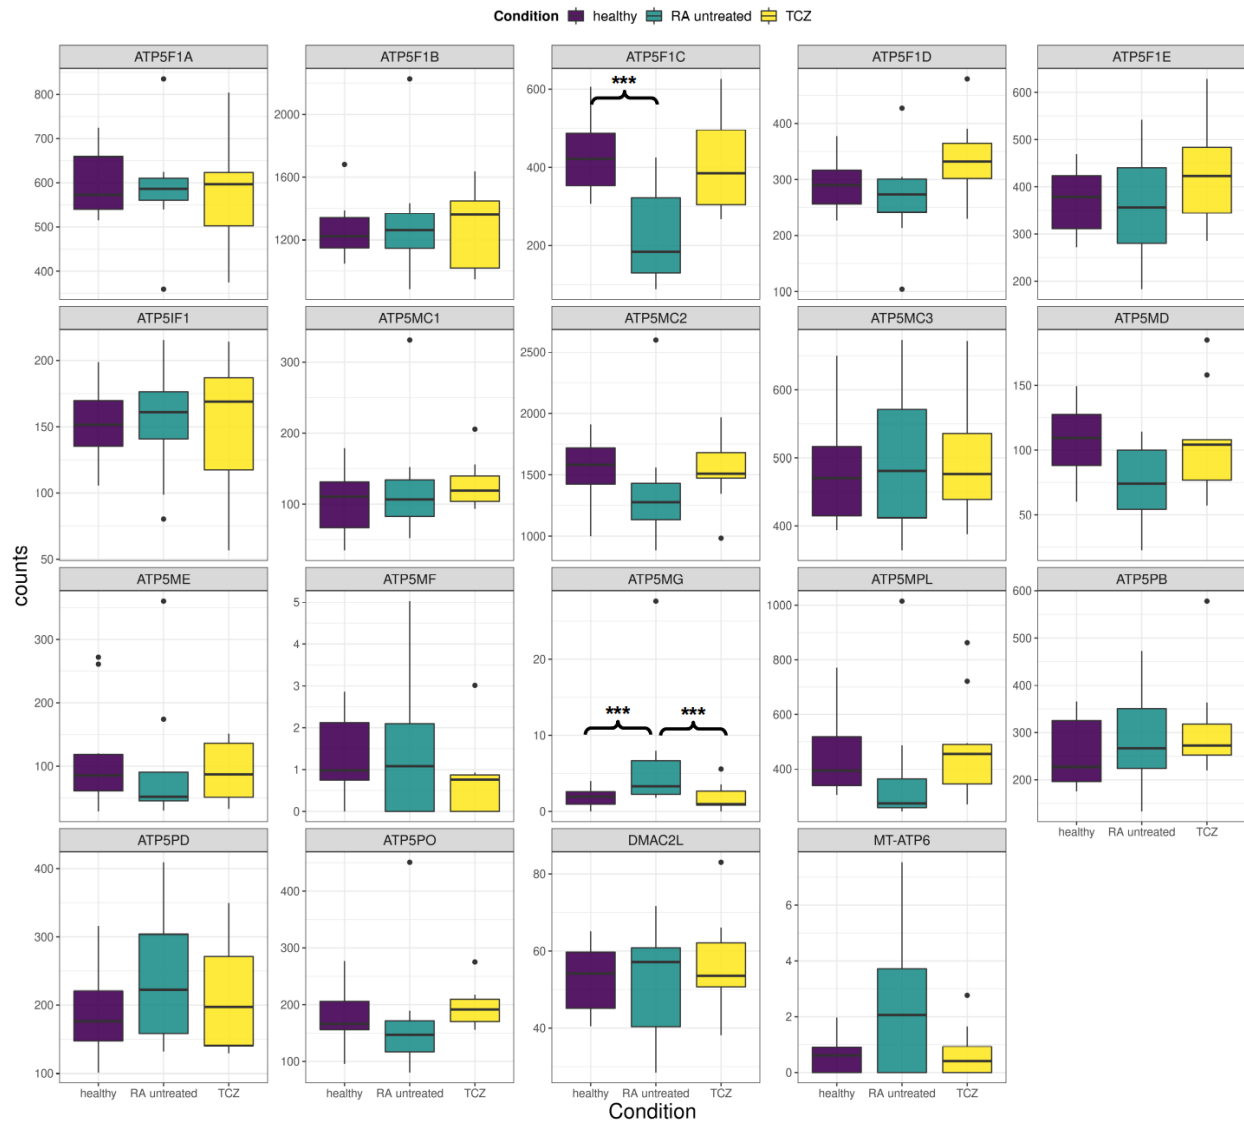

Figure S6. Normalized counts of oxidative phosphorylation complex 5 genes in untreated RA CD8<sup>+</sup> Tem cells and TCZ treated RA CD8<sup>+</sup> Tem cells.

## Comparison of untreated RA CD8<sup>+</sup> Tem cells and CD8<sup>+</sup> Temra cells

The expression levels of genes from glycolysis, pentose phosphate pathway, TCA cycle, Oxidative phosphorylation complex 1, 4 and 5 in the CD8<sup>+</sup> Tem and CD8<sup>+</sup> Temra cells from healthy and untreated RA individuals are shown in the following figures. Significant differential expression is marked by asterisk (\*\*\*)

Glycolysis genes CD8+ Tem and CD8+ Temra cells

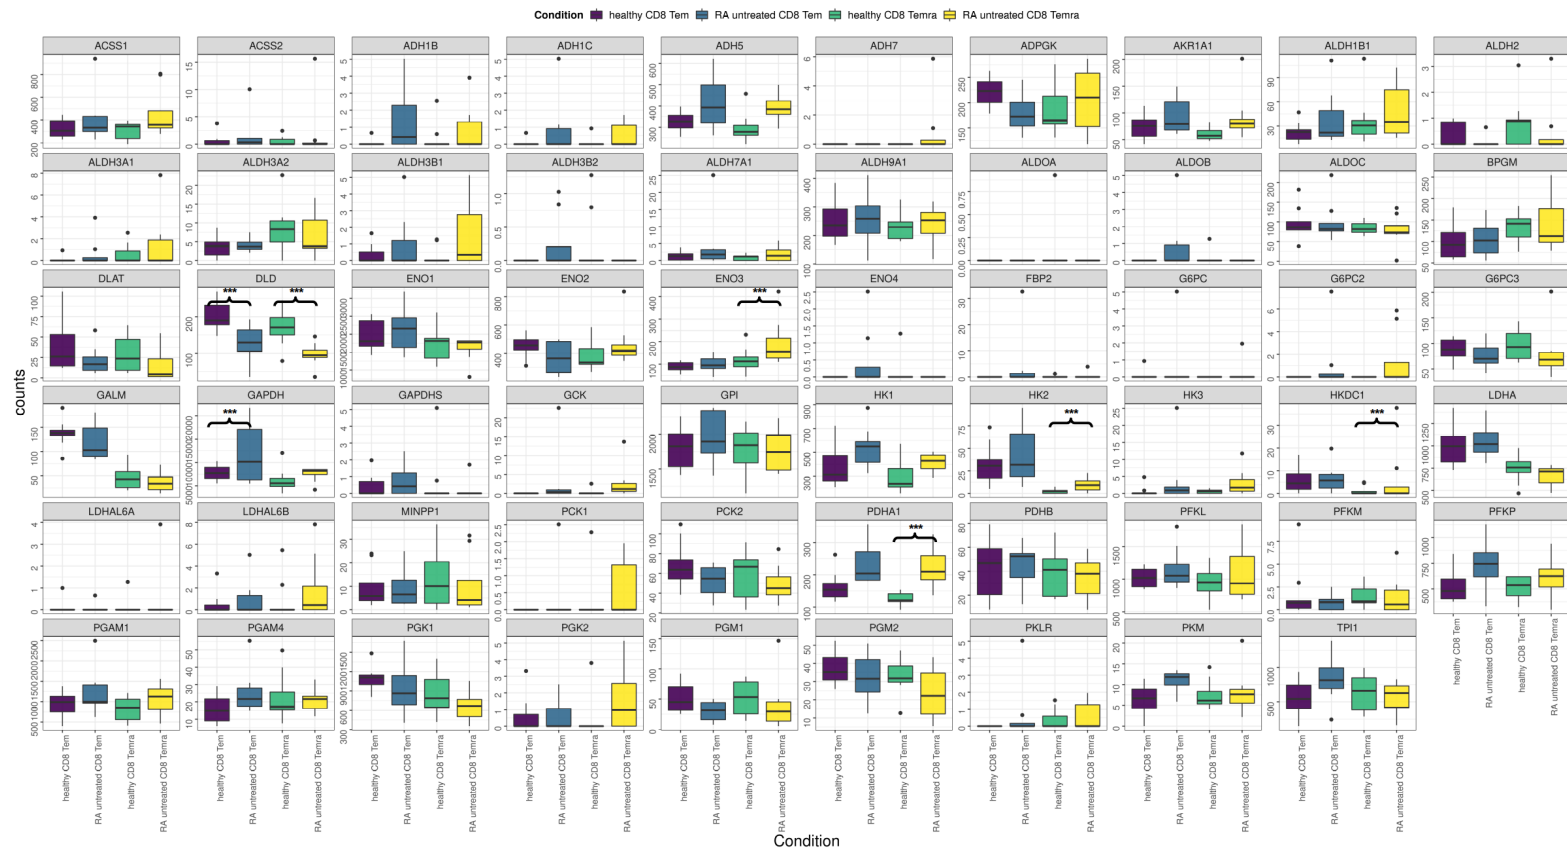

Figure S7. Normalized counts of glycolysis genes in untreated RA CD8+ Tem cells or in untreated RA CD8+ Temra cells

# PPP genes CD8+ Tem and CD8+ Temra cells

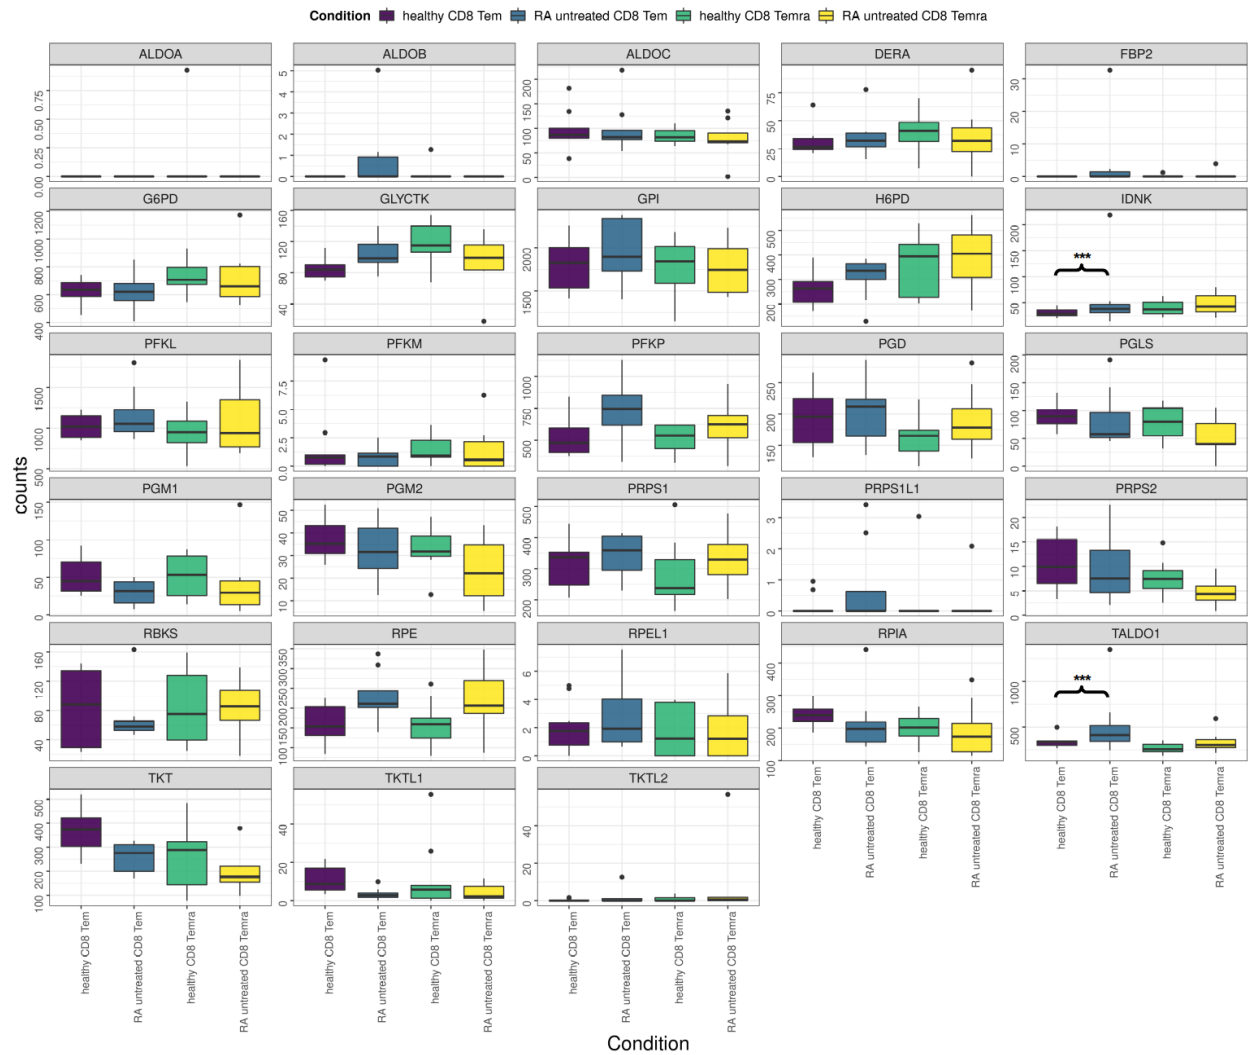

Figure S8. Normalized counts of pentose phosphate pathway genes in untreated RA CD8<sup>+</sup> Tem cells or in untreated RA CD8<sup>+</sup> Temra cells



# TCA cycle genes CD8<sup>+</sup> Tem and CD8<sup>+</sup> Temra cells

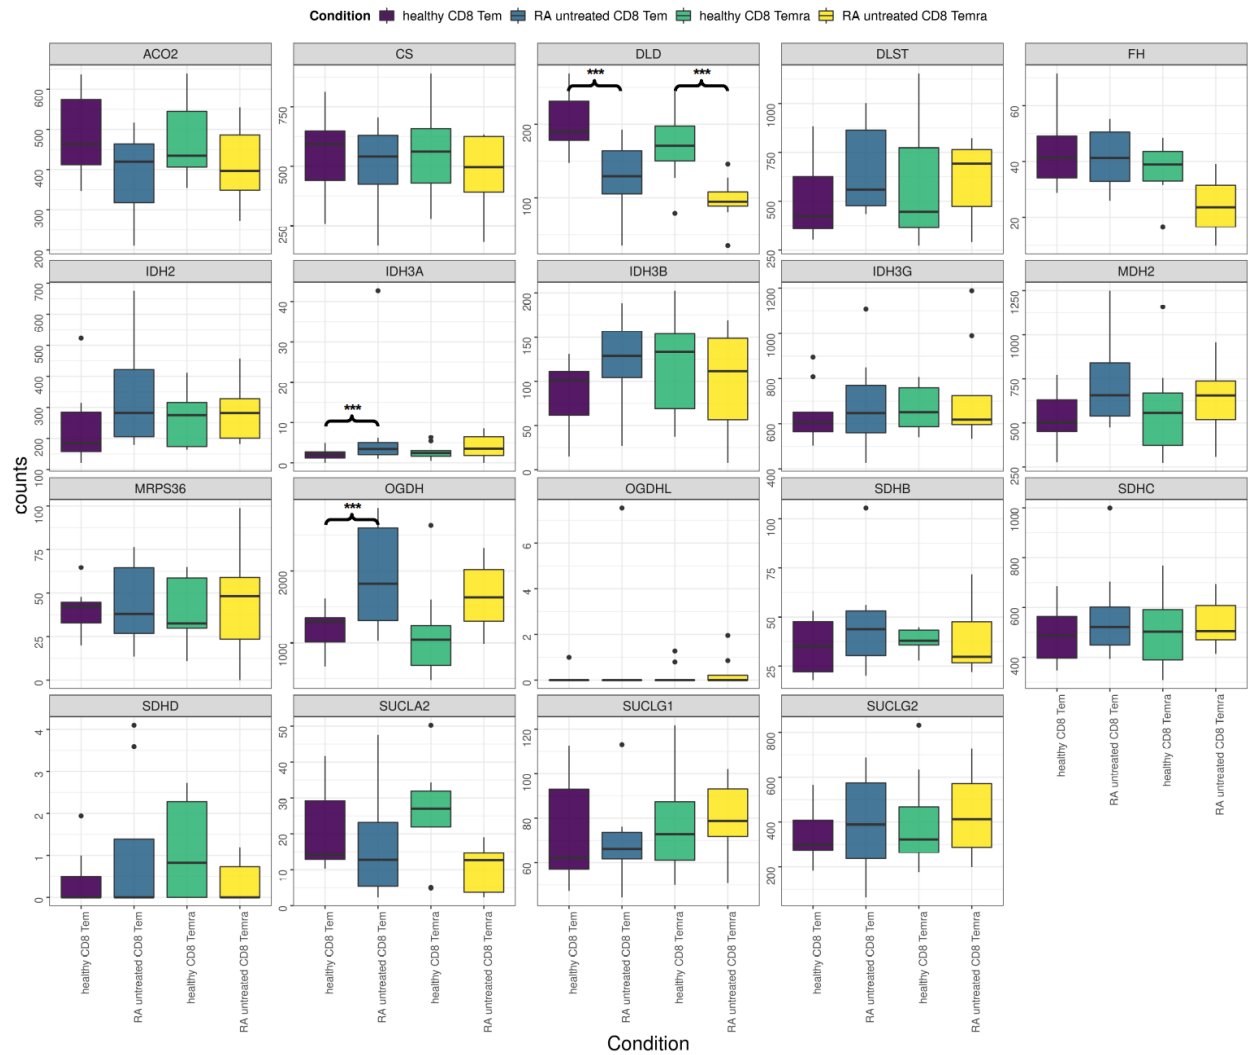

Figure S9. Normalized counts of TCA cycle genes in untreated RA CD8<sup>+</sup> Tem cells or in untreated RA CD8<sup>+</sup> Temra cells

## OXPHOS Complex 1 genes CD8+ Tem and CD8+ Temra cells

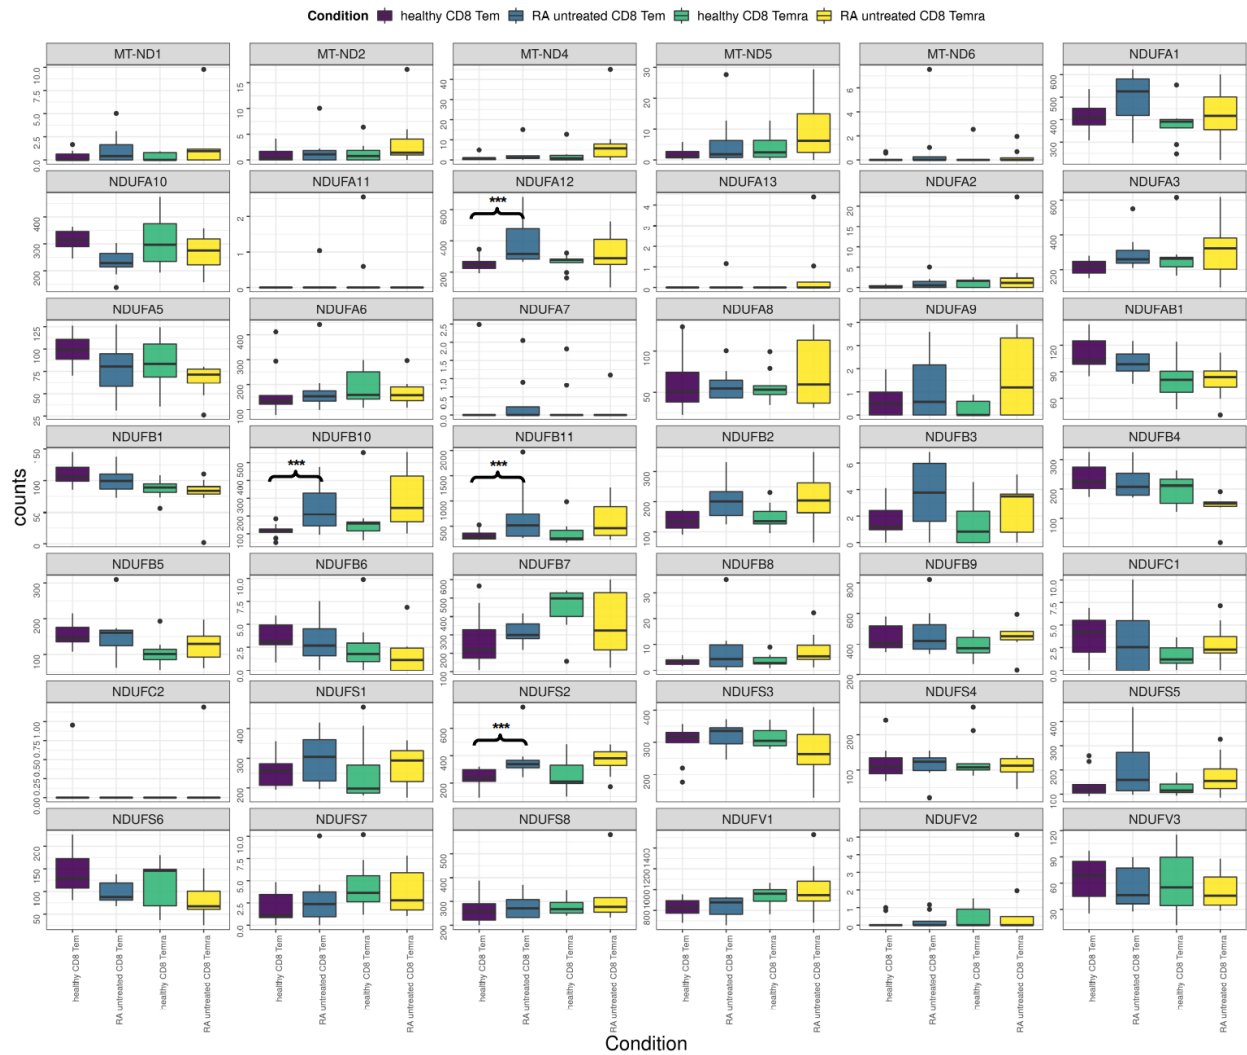

Figure S10. Normalized counts of oxidative phosphorylation complex 1 genes in untreated RA CD8<sup>+</sup> Tem cells or in untreated RA CD8<sup>+</sup> Temra cells

## OXPHOS Complex 4 genes CD8+ Tem and CD8+ Temra cells

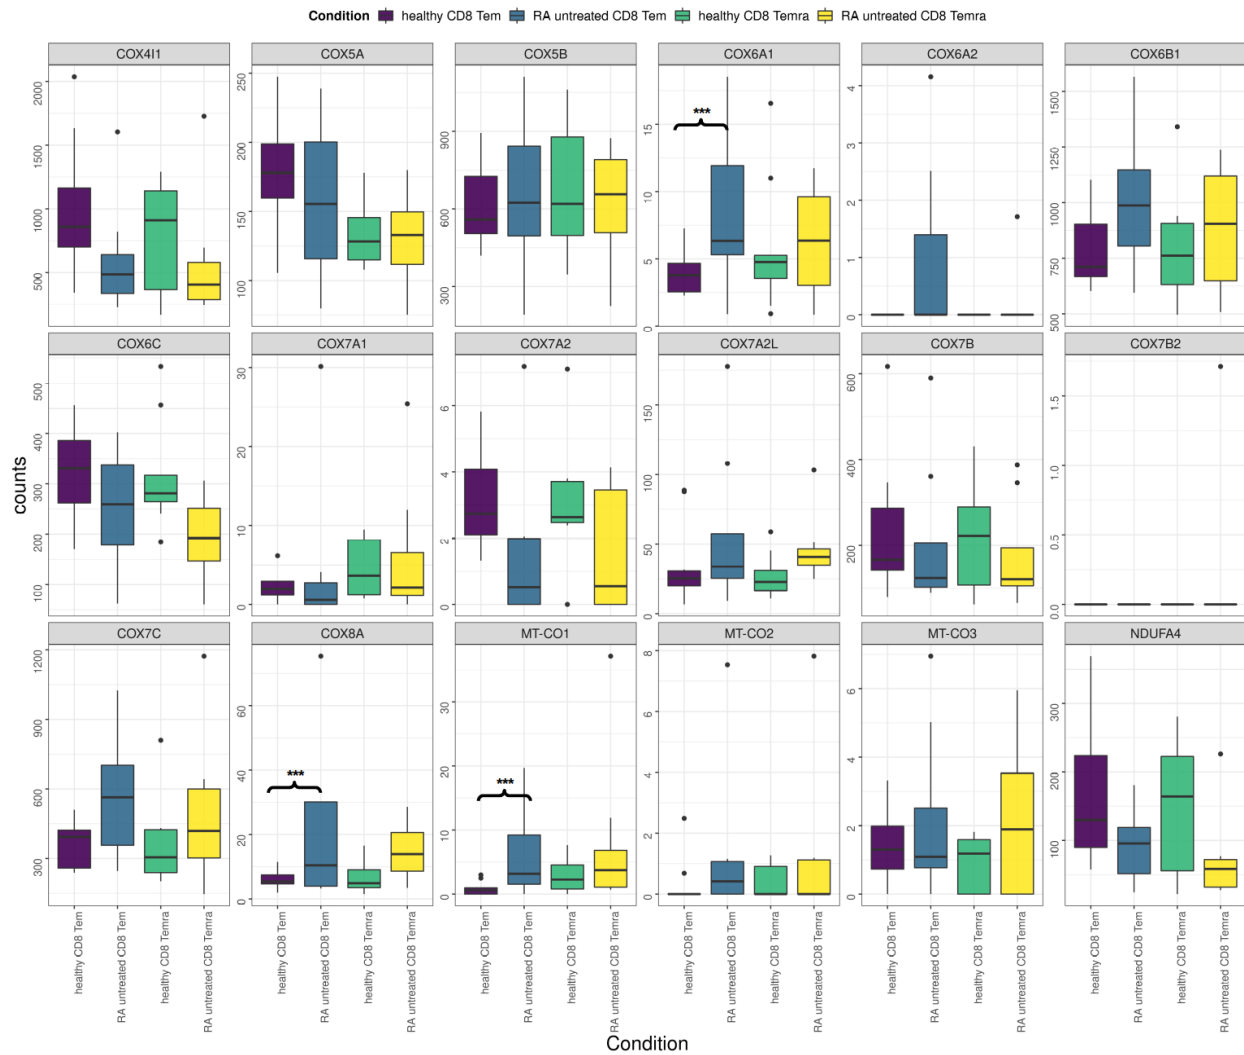

Figure S11. Normalized counts of oxidative phosphorylation complex 4 genes in untreated RA CD8<sup>+</sup> Tem cells or in untreated RA CD8<sup>+</sup> Temra cells

# OXPHOS Complex 5 genes CD8+ Tem and CD8+ Temra cells

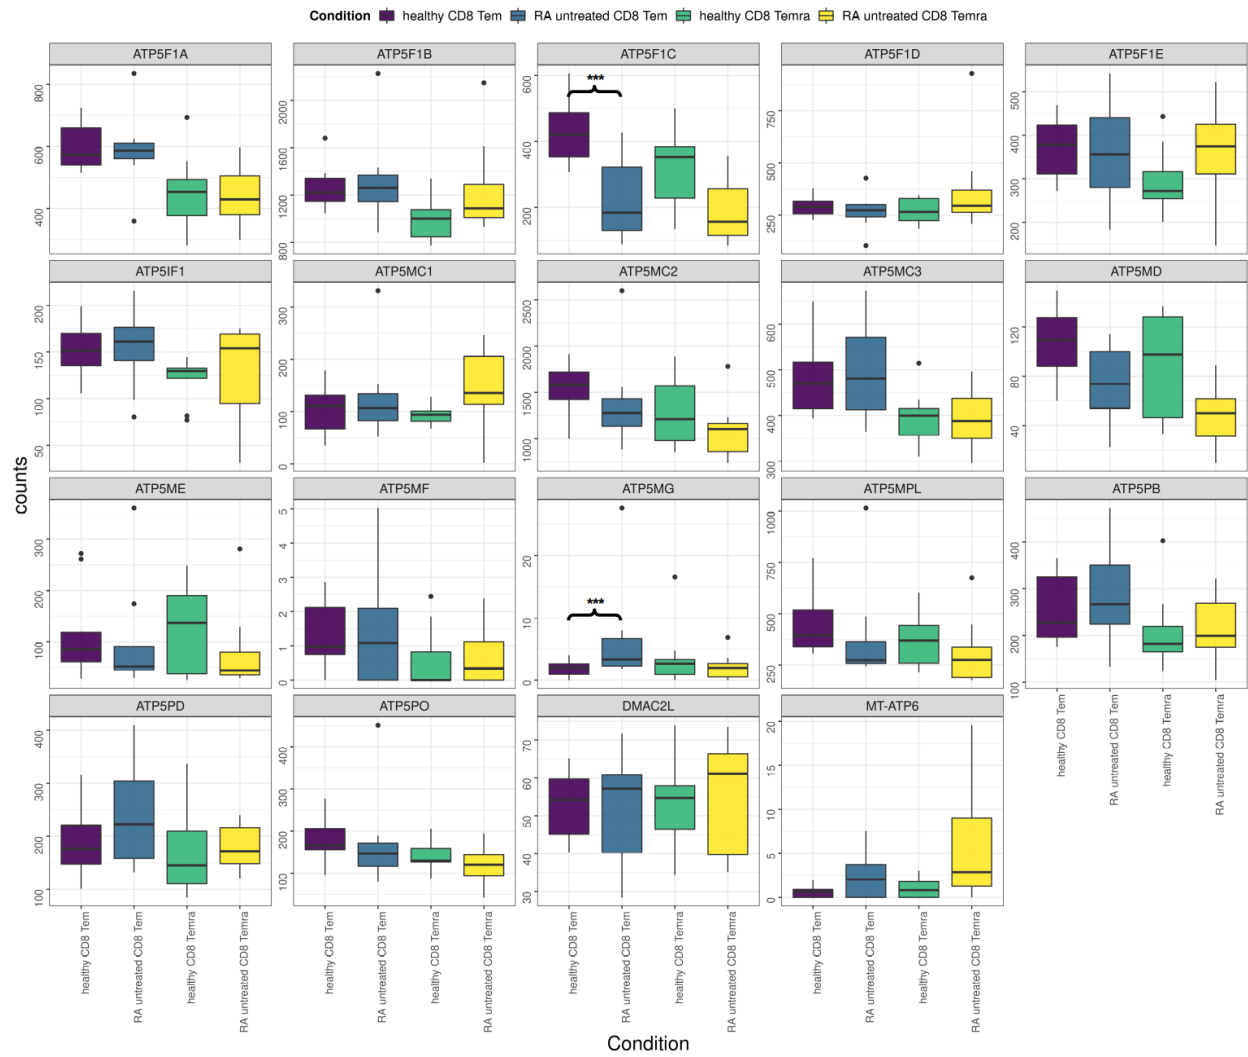

Figure S12. Normalized counts of oxidative phosphorylation complex 45 genes in untreated RA CD8<sup>+</sup> Tem cells or in untreated RA CD8<sup>+</sup> Temra cells
